# Supplementary material for: Cross Effects of Diets and Rearing Temperatures on Gastrointestinal Evacuation and Growth Performance in Adult Sabah Groupers (Epinephelus fuscoguttatus × E. lanceolatus)
Source: MDPI journal article supplement (doi:10.3390/ani12223172), 2022-11-16
Supplement: s1 [file s1]

(a) 28 °C

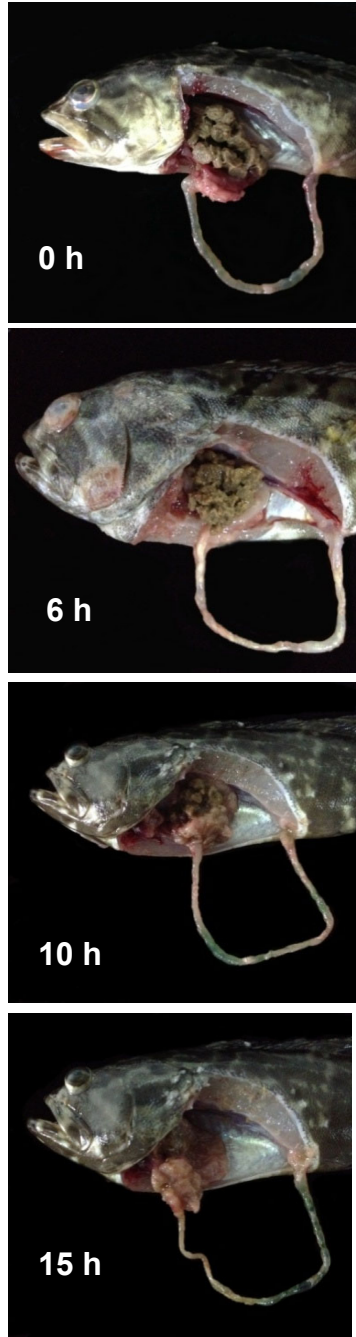

(b) 30 °C

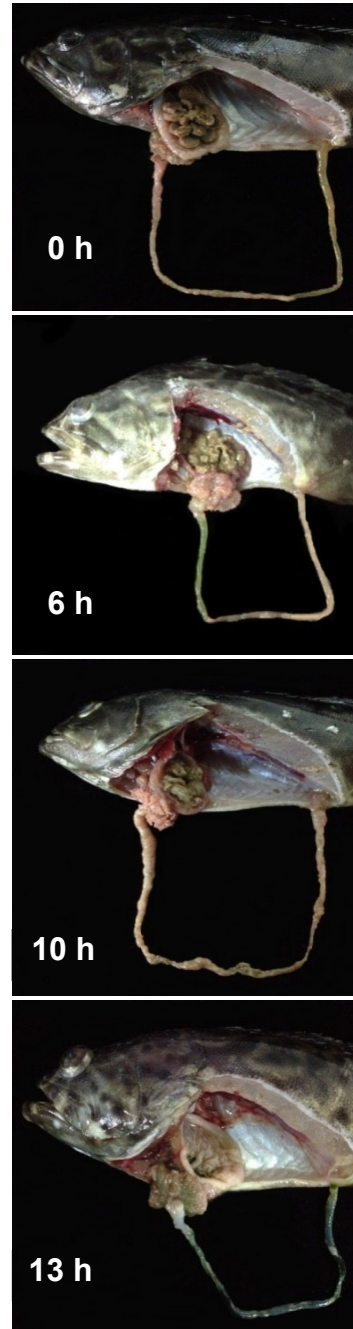

(c) 32 °C

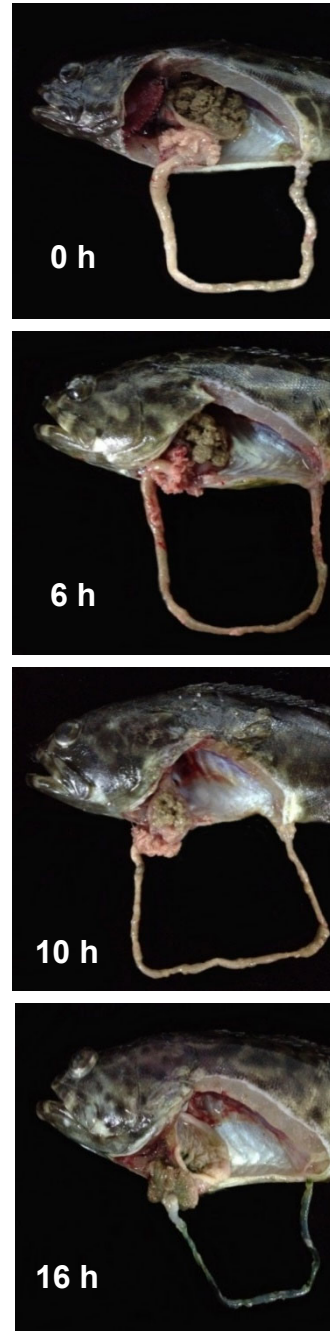

(d) 34 °C

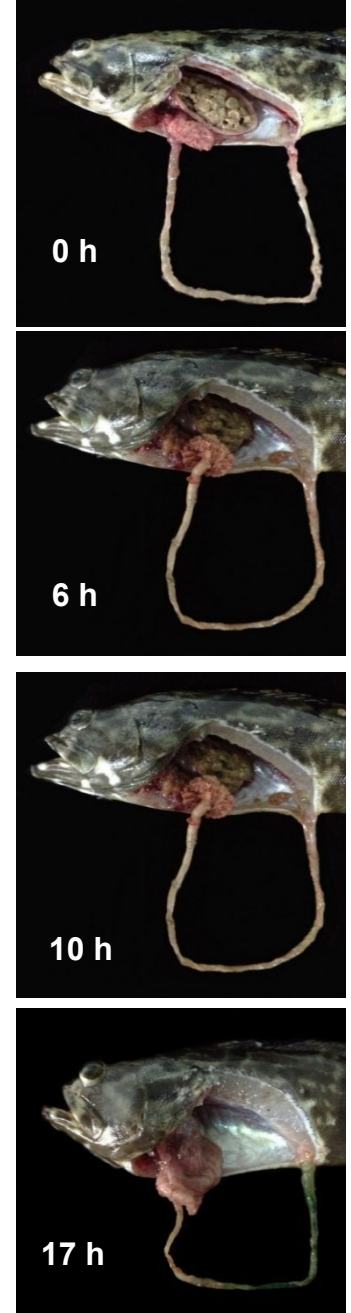

**Figure S1.** Movement of pellet feed along the alimentary tract of the adult hybrid Sabah grouper by stomach dissection at (a) 28 °C, (b) 30 °C, (c) 32 °C, and (d) 34 °C. Five fish were used for each sampling point and temperature.
